# Supplementary material for: MicroRNAs Enhance Keratinocyte Proliferative Capacity in a Stem Cell-Enriched Epithelium
Source: PLoS One. 2015 Aug 6;10(8):e0134853. doi: 10.1371/journal.pone.0134853 (PMC4527697; doi:10.1371/journal.pone.0134853)
Supplement: S1 Table — (XLSX) [file pone.0134853.s003.xlsx]

## Sheet: specs (1)
					Sequence Name	Sequence											Final OD	nmoles	Print Date	Well Position
					NOXA NM_021127 FWD Set 1	AAG AAG GCG CGC AAG AA											4.9	26.6	2015-02-15 15:16:06
					NOXA NM_021127 REV Set 1	CGG AAG TTC AGT TTG TCT CCA											7.3	36.6	2015-02-15 15:16:06
					HMOX1 NM_002133 FWD Set 2	TGC TCA ACA TCC AGC TCT TT											5.8	32.8	2015-02-15 15:16:06
					HMOX1 NM_002133 REV Set 2	GGC AGA ATC TTG CAC TTT GTT											7.3	37.7	2015-02-15 15:16:06
					c-MAF NM_005360 FWD Set 2	GCA CTT TGC ACA GAG GTA GA											6.4	31.8	2015-02-15 15:16:06
					c-MAF NM_005360 REV Set 2	CTC TTC TGC TTG GCT CTC TTT											6	35.8	2015-02-15 15:16:06
					KLF2 NM_016270 FWD Set 3	ACA CAG GTG AGA AGC CCT AC											5.7	28.7	2015-02-15 15:16:06
					KLF2 NM_016270 REV Set 3	CCG TGT GCT TTC GGT AGT											4.8	29.4	2015-02-15 15:16:06
					TXNIP NM_006472 FWD Set 4	CTT ACT GAT CTA TGT TAG CGT TCC T											9.3	40.7	2015-02-15 15:16:06
					TXNIP NM_006472 REV Set 4	CTG GAT GTT CTG CTG CTT AGA											5.9	30.5	2015-02-15 15:16:06
					AP-1 NM_002228 FWD Set 3	TTC TAT GAC GAT GCC CTC AAC
					AP-1 NM_002228 REV Set 3	TCA GGG TCA TGC TCT GTT TC
					JUN-D NM_001286968 FWD Set 1	ACG AGC TCA CAG TTC CTC TA
					JUN-D NM_001286968 REV Set 1	GCT GGT TCT GCT TGT GTA AAT C
					KLF6-a NM_001300 FWD Set 4	CCA TGT GCA GCA TCT TCC A
					KLF6-a NM_001300 REV Set 4	AGC TCT AGG CAG GTC TGT T
					PPP1R15A NM_014330 FWD Set 2	AGA AAG GTG CGC TTC TCC
					PPP1R15A NM_014330 REV Set 2	CTG CGA TCC CGA GCA AG
