# Supplementary material for: MicroRNAs Enhance Keratinocyte Proliferative Capacity in a Stem Cell-Enriched Epithelium
Source: PLoS One. 2015 Aug 6;10(8):e0134853. doi: 10.1371/journal.pone.0134853 (PMC4527697; doi:10.1371/journal.pone.0134853)
Supplement: S3 Table — (XLS) [file pone.0134853.s005.xls]

## Sheet: Sheet1
probelist	geneSymbol	geneName	geneEntrezid	Illimina_probeID	P.Value	adj.P.Val	Foldchange
BjpCEsgkinlRqHsFbQ	IDH1	isocitrate dehydrogenase 1 (NADP+), soluble	3417	ILMN_1696432	0.000650997	0.00756895	-1.42016
NE.53uBzVeZ.gblJJU	ORC5	origin recognition complex, subunit 5	5001	ILMN_1705093	3.35336e-08	2.4973e-05	-1.44909
ZeiAv5BVNNFCexSLko	HSPA8	heat shock 70kDa protein 8	3312	ILMN_1686367	9.14497e-05	0.00197539	-1.44937
K3iR8WpuFv3yu4iqe4	UBN1	ubinuclein 1	29855	ILMN_2399503	4.45615e-08	2.69321e-05	-1.44948
QJUo3p.lIr5BO_IgVo	ABCB9	ATP-binding cassette, sub-family B (MDR/TAP), member 9	23457	ILMN_2343048	4.54416e-09	1.01523e-05	-1.46088
Hp.kpTMl3nkDnSV574	EEF2K	eukaryotic elongation factor-2 kinase	29904	ILMN_1789171	7.6975e-06	0.000410857	-1.46287
KnEn78Gku09V.kew4o	EFNB2	ephrin-B2	1948	ILMN_1703852	6.34373e-06	0.000363013	-1.47332
NpQJE5KdevvXdAXueE	FBN2	fibrillin 2	2201	ILMN_1670899	4.59567e-06	0.000289805	-1.48084
9XtThfqRKgveu0yM1Y	IDH1	isocitrate dehydrogenase 1 (NADP+), soluble	3417	ILMN_2091347	0.00141024	0.0132253	-1.49376
lioZzl05W.6u10UkKc	TNFRSF1A	tumor necrosis factor receptor superfamily, member 1A	7132	ILMN_1685005	0.0001154	0.00233766	-1.49618
fR1MSzyuKOjmpntflo	EHD1	EH-domain containing 1	10938	ILMN_1651832	2.46851e-05	0.000810488	-1.50038
9eAUiN7DTdz6XquXuc	TMEM43	transmembrane protein 43	79188	ILMN_1698605	2.90871e-05	0.000891947	-1.50169
36FHzuY1uhR_bmN7aU	WDR4	WD repeat domain 4	10785	ILMN_1656628	4.62016e-08	2.69321e-05	-1.50415
rjoMglfvnsjubkt6SU	PTP4A2	protein tyrosine phosphatase type IVA, member 2	8073	ILMN_2338997	4.40977e-08	2.69321e-05	-1.50636
xXQSlSoqC7iZfrOHwA	IRF1	interferon regulatory factor 1	3659	ILMN_1708375	1.04322e-08	1.16535e-05	-1.51504
c6ak7i5EI6AiY_iTXo	ANTXR2	anthrax toxin receptor 2	118429	ILMN_1812926	9.94574e-09	1.16535e-05	-1.527
E3u67.sWkajOgYAef4	CXCR7	chemokine (C-X-C motif) receptor 7	57007	ILMN_1798360	7.15975e-06	0.000391551	-1.53223
W59dKlRT4Ir48JQULs	HSPA8	heat shock 70kDa protein 8	3312	ILMN_2413084	3.3558e-05	0.00098649	-1.55141
cUR6fjo0VUoqgDrpDk	CNPY2	canopy 2 homolog (zebrafish)	10330	ILMN_3243471	3.6751e-05	0.00106238	-1.56052
xnlUuzt_X3WbT76CKI	STARD7	StAR-related lipid transfer (START) domain containing 7	56910	ILMN_1740819	2.52863e-06	0.000204898	-1.58245
KXXaHaHavzNmXR9NUs	EIF5	eukaryotic translation initiation factor 5	1983	ILMN_1815733	2.33498e-06	0.000199545	-1.59936
cjif7cfQC.v58VfSXU	GJB2	gap junction protein, beta 2, 26kDa	2706	ILMN_1769388	2.09273e-08	1.92519e-05	-1.63095
i65p6U6ICeH6eu6xIg	MAT2A	methionine adenosyltransferase II, alpha	4144	ILMN_1737298	6.99481e-06	0.000389295	-1.66837
KMrUN53QpfrXrqPX0U	TNFRSF21	tumor necrosis factor receptor superfamily, member 21	27242	ILMN_1699695	5.90443e-07	9.91894e-05	-1.67779
3kkAUB6t9J.NVv35Co	HAS3	hyaluronan synthase 3	3038	ILMN_1794501	3.79764e-07	7.34336e-05	-1.95734
u5fXW__biBW7lX1RTM	SEMA4B	sema domain, immunoglobulin domain (Ig), transmembrane domain (TM) and short cytoplasmic domain, (semaphorin) 4B	10509	ILMN_1672589	3.77646e-06	0.000256783	-2.21748
QeUV54t73rDarMMp3k	JAG1	jagged 1	182	ILMN_1691376	3.39714e-09	8.85465e-06	-2.25696
